# Supplementary material for: Updated isoprene and terpene emission factors for the Interactive BVOC (iBVOC) emission scheme in the United Kingdom Earth System Model (UKESM1.0)
Source: Copernicus journal article supplement (doi:10.5194/gmd-16-3083-2023), 2023-06-01
Supplement: Supplementary file 1 [file gmd-16-3083-2023-supplement.pdf]

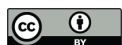

*Supplement of*

**Updated isoprene and terpene emission factors for the Interactive BVOC (iBVOC) emission scheme in the United Kingdom Earth System Model (UKESM1.0)**

**James Weber et al.**

*Correspondence to:* James Weber ([j.weber@sheffield.ac.uk](mailto:j.weber@sheffield.ac.uk))

The copyright of individual parts of the supplement might differ from the article licence.

# Supplementary Information: Updated Isoprene and Terpene Emission Factors for the Interactive BVOC Emission Scheme (iBVOC) in the United Kingdom Earth System Model (UKESM)

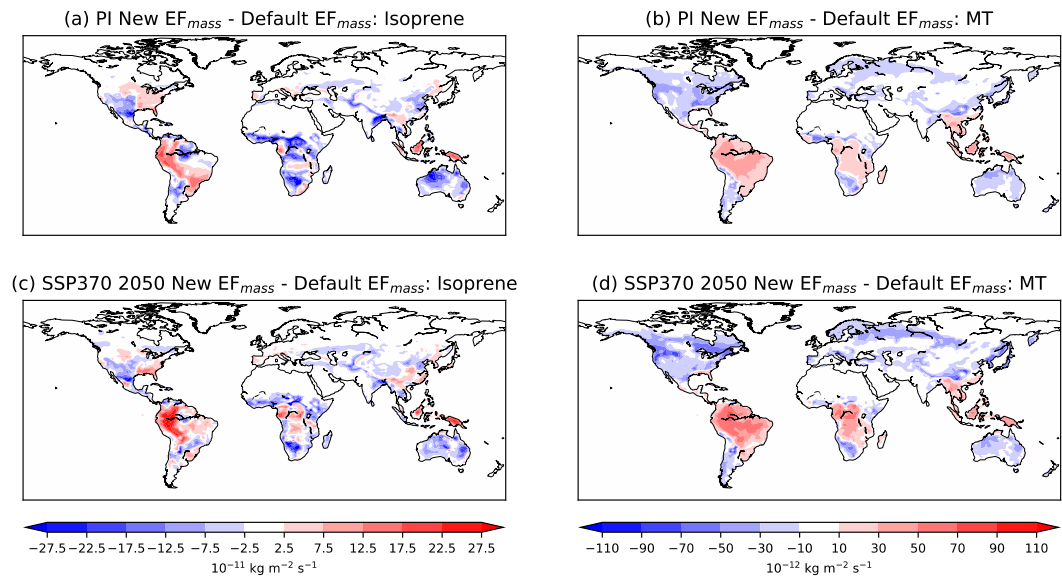

**Fig S1.** Change in (a, c) isoprene and (b, d) monoterpene emissions following the change in  $EF_{mass}$  values for the PI and SSP3-7.0 2050 scenarios.

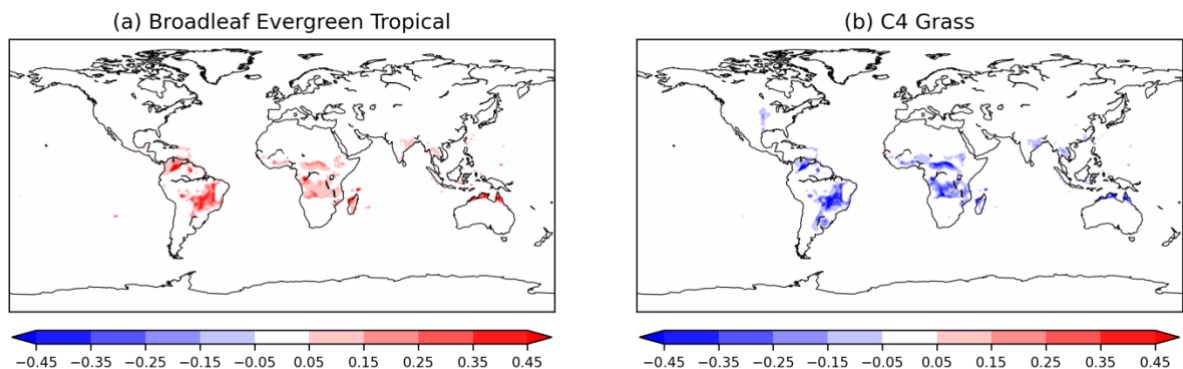

15 **Fig S2.** Change in PFT fractional coverage from 2010 to 2050 in the Maxforest scenario for (a) Broadleaf Evergreen Tropical trees and (b) C4 grass.

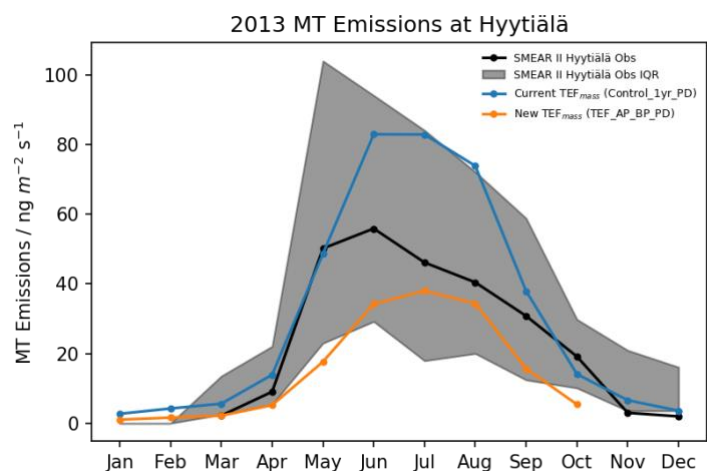

20 **Fig S3.** Measured monoterpene emissions at the SMEAR II station in Hyytiälä and simulated monoterpene emissions using the current  $TEF_{mass}$  (Control\_1yr\_PD) and updated  $TEF_{mass}$  (TEF\_AP\_BP\_PD) values from the grid cell containing the SMEAR II station. It is important to note that while the measurement station at Hyytiälä is in a completely forested area, the corresponding grid cell in UKESM is only 54% trees (27% each needleleaf evergreen and needleleaf deciduous) with the remainder predominantly C3 grass, C3 crops and water (lakes), which have negligible or zero  $TEF_{mass}$  so we would expect UKESM1 to simulate lower terpene emissions than the fully forested region measurement site.

25

Table S1. ORCHIDEE specific leaf area (SLA) values. Taken from  
<https://forge.ipsl.jussieu.fr/orchidee/wiki/Documentation/OrchideeParameters>,

| PFT                                    | SLA / m <sup>2</sup> gC <sup>-1</sup> |
|----------------------------------------|---------------------------------------|
| Needleleaf Evergreen<br>Temperate Tree | 0.00926                               |
| Needleleaf Evergreen<br>Boreal Tree    | 0.02                                  |
| Needleleaf Deciduous<br>Boreal Tree    | 0.019                                 |
| Broadleaf Evergreen<br>Tropical Tree   | 0.0153                                |
| Broadleaf Evergreen<br>Temperate Tree  | 0.02                                  |
| Broadleaf Deciduous<br>Tropical Tree   | 0.026                                 |
| Broadleaf Deciduous<br>Temperate Tree  | 0.026                                 |
| Broadleaf Deciduous<br>Boreal Tree     | 0.026                                 |
| Arctic C3 Grass                        | 0.026                                 |
| Cool C3 Grass                          | 0.026                                 |
| Warm C4 Grass                          | 0.026                                 |
| Crops                                  | 0.026                                 |
